## **SARS-CoV-2 infection of human neurons requires endosomal cell entry and can be blocked by inhibitors of host phosphoinositol-5 kinase**

**Running title: SARS-COV-2 Infects human neurons from endosomes**

Pinja Kettunen<sup>1\*</sup>, Angelina Lesnikova<sup>2\*</sup>, Noora Räsänen<sup>1</sup>, Ravi Ojha<sup>2</sup>, Leena Palmunen<sup>2</sup>, Markku Laakso<sup>3</sup>, Šárka Lehtonen<sup>1,4</sup>, Johanna Kuusisto<sup>3</sup>, Olli Pietiläinen<sup>1</sup>, Olli P. Vapalahti<sup>2</sup>, Jari Kostinaho<sup>1</sup>, Taisia Rolova<sup>1#</sup> and Giuseppe Balistreri<sup>2#</sup>

<sup>1</sup>Neuroscience Center, HiLIFE, University of Helsinki, Helsinki, Finland.

<sup>2</sup>Department of Virology, University of Helsinki, Helsinki, Finland.

<sup>3</sup>Institute of Clinical Medicine, University of Eastern Finland.

<sup>4</sup>A. I. Virtanen Institute for Molecular Sciences, University of Eastern Finland.

\*Contributed equally; author order was determined based on the time of joining the project.

#correspondence should be addressed to [taisia.rolova@helsinki.fi](mailto:taisia.rolova@helsinki.fi), [giuseppe.balistreri@helsinki.fi](mailto:giuseppe.balistreri@helsinki.fi)

Abstract word count: 246 words

Text word count: 8378

## 1 **Abstract**

2 COVID-19 is a disease caused by coronavirus SARS-CoV-2. In addition to respiratory  
3 illness, COVID-19 patients exhibit neurological symptoms that can last from weeks to  
4 months (long COVID). It is unclear whether these neurological manifestations are due  
5 to infection of brain cells. We found that a small fraction of cortical neurons, but not  
6 astrocytes, were naturally susceptible to SARS-CoV-2. Based on the inhibitory effect  
7 of blocking antibodies, the infection seemed to depend on the receptor angiotensin-  
8 converting enzyme 2 (ACE2), which was expressed at very low levels. Although only  
9 a limited number of neurons was infectable, the infection was productive, as  
10 demonstrated by the presence of double-stranded RNA in the cytoplasm (the hallmark  
11 of viral replication), abundant synthesis of viral late genes localized throughout the  
12 neuronal cell, and an increase in viral RNA in the culture medium within the first 48 h  
13 of infection (viral release). The productive entry of SARS-CoV-2 requires the fusion of  
14 the viral and cellular membranes, which results in the delivery of viral genome into the  
15 cytoplasm of the target cell. The fusion is triggered by proteolytic cleavage of the viral  
16 surface protein spike, which can occur at the plasma membrane or from  
17 endo/lysosomes. Using specific combinations of small-molecule inhibitors, we found  
18 that SARS-CoV-2 infection of human neurons was insensitive to nafamostat and  
19 camostat, which inhibit cellular serine proteases found on the cell surface, including  
20 TMPRSS2. In contrast, the infection was blocked by apilimod, an inhibitor of  
21 phosphatidylinositol 5 kinase (PIK5K) that regulates endosomal maturation.

## 22 **Importance**

23 COVID-19 is a disease caused by coronavirus SARS-CoV-2. Millions of patients  
24 display neurological symptoms, including headache, impairment of memory, seizures  
25 and encephalopathy, as well as anatomical abnormalities such as changes in brain

26 morphology. Whether these symptoms are linked to brain infection is not clear. The  
27 mechanism of the virus entry into neurons has also not been characterized. Here we  
28 investigated SARS-CoV-2 infection using a human iPSC-derived neural cell model and  
29 found that a small fraction of cortical neurons was naturally susceptible to infection.  
30 The infection depended on the ACE2 receptor and was productive. We also found that  
31 the virus used the late endosomal/lysosomal pathway for cell entry and that the  
32 infection could be blocked by apilimod, an inhibitor of the cellular phosphatidylinositol  
33 5 kinase.

34

## 35 **Introduction**

36 A variety of neurological symptoms have been observed in millions of COVID-19  
37 patients which has led to a hypothesis that SARS-CoV-2 could infect brain cells. Such  
38 symptoms include fatigue, headache, impairment of concentration and memory ('brain  
39 fog'), seizures, and encephalopathy (1). Structural changes in the brain anatomy have  
40 also been observed. A magnetic resonance imaging study of 785 participants found  
41 reductions in grey matter thickness and global brain volume in combination with  
42 changes in tissue contrast and tissue damage markers in certain brain areas (2). Post-  
43 mortem analysis of deceased COVID-19 patients has indicated sporadic presence of  
44 viral components in neurons, glial, and endothelial cells in different regions of the brain  
45 including the olfactory bulb (OB), which connects the olfactory sensory neurons of the  
46 nasal epithelium to the central nervous system (CNS) via a dense network of nerves  
47 (3–8). In *in vitro* cell culture models, SARS-CoV-2 can infect neurons derived from  
48 human embryonic stem cells (ESCs) and iPSCs in both two-dimensional (monolayers)  
49 and three-dimensional models (e.g., organoids) (7, 9–15). Some studies also reported  
50 infection in iPSC/hESC-derived astrocytes (8, 13, 15).

51 Bona fide neurotropic viruses such as rabies, poliovirus, or tick-borne encephalitis  
52 virus, cause severe neuronal infection that spreads to large areas of the brain with  
53 paralyzing or lethal consequences (16–19). The potential of SARS-CoV-2 to infect  
54 very limited areas of the brain, and the possibility that this non-lethal infection could  
55 be transient, could explain some of the neurological manifestations in patients that  
56 suffer long COVID.

57 How SARS-CoV-2 enters brain cells is not clear. Also, whether the virus can spread  
58 from the initially infected neurons is debated, with studies showing both productive  
59 (10, 14) and non-productive infection (9, 12, 20).

60 Analysis of the SARS-CoV-2 infection in cell lines and primary respiratory epithelial  
61 cell models indicates that the virus has at least two possible entry routes: i)  
62 endocytosis and fusion from lysosomes or ii) direct fusion at the plasma membrane  
63 (21–23). Both mechanisms require a mildly acidic environment (pH <6.8) and the  
64 activation of the viral surface protein spike (S) by cellular proteases such as cathepsin-  
65 L (in lysosomes) or serine proteases such as TMPRSS2 (at the plasma membrane).  
66 Depending on the cellular availability of these proteases, infection can occur within  
67 lysosomes or at the cell surface. Inhibitors of endosome maturation (e.g., PIK5K  
68 inhibitors) block virus infection from endo-/lysosomes (21). Inhibitors of serine  
69 proteases (e.g., nafamostat and camostat) block infection from the plasma membrane.  
70 Here, we use authentic SARS-COV-2 to investigate the infection route and the  
71 spreading potential of the virus in 2D-cultured human iPSC-derived neurons,  
72 astrocytes and neuron-astrocyte co-cultures.

73

## 74 **Results and discussion**

### 75 **Characterization of human iPSC-derived neurons and astrocytes**

76 To study the viral entry mechanisms in human brain cells, we set up a human iPSC-  
77 derived neuron-astrocyte co-culture system in a 96-well plate format.  
78  
79 Firstly, we confirmed neuronal identity of the cells by positive staining for neuronal  
80 markers microtubule-associated protein (MAP2) and tubulin 3 (Fig. 1A & B).  
81 Furthermore, most of the neurons displayed a nuclear expression of Cux1, a marker  
82 for upper cortical layer neurons (layers II-III) (Fig. 1C) and lacked CTIP2, which is a  
83 marker for lower cortical layers V and VI (data not shown). In addition, most of the  
84 neurons showed robust staining with vesicular glutamate transporter 1 (Vglut1) (Fig.  
85 1D). Together, these data imply that our cultures consist mainly of excitatory  
86 glutamatergic neurons of upper cortical layer (II-III) identity. However, some neurons  
87 displayed positive staining for GABA (Fig. 1B), which suggests that the cultures also  
88 contain small subsets of inhibitory GABAergic interneurons. The identity of iPSC-  
89 derived human astrocytes, obtained by a different induction protocol described in the  
90 methods, was confirmed by staining with astrocyte markers glial fibrillary acidic protein  
91 (GFAP) (Fig. 1E), S100 $\beta$  (Fig. 1F) and aquaporin 4 (AQP4) (Fig. 1G). The expression  
92 of GFAP and S100 $\beta$  mRNAs was further confirmed by qRT-PCR (Fig. 1H & I).  
93 Secondly, we used a microelectrode array (MEA) to estimate the maturity and  
94 functionality of the neuron-astrocyte co-cultures. The experiment showed that our  
95 neuron-astrocyte co-cultures develop an electrically active network capable of both  
96 single-electrode (Figure 1J-K) and network bursting (Fig. 1L). Cultures started  
97 developing electric bursting activity after three weeks of maturation (Fig. K) and  
98 network bursting appeared one week later (day 29, Fig. 1L). By day 31, most of the  
99 recording electrodes (>80%) participated in both single-electrode bursting and network  
100 bursting (Fig. K-L). Network burst duration increased until day 31 (duration 0.7s, Fig.

101 1 M). Representative images of MEA recordings from all 16 electrodes at days 21, 30,  
102 31 and 35 are shown in Fig. 1N (10-second interval).

103

104 Finally, we used qRT-PCR to assess the expression of cell surface structures known  
105 to be important for SARS-CoV-2 infection in the respiratory tract. The expression of  
106 ACE2 and TMPRSS2 mRNA in iPSC-derived cortical neurons and astrocytes was  
107 detectable but very low (Fig. 1O). Both neurons and astrocytes expressed detectable  
108 levels of the entry co-factor neuropilin 1 (NRP1) (Fig. 1O), a protein that controls  
109 axonal development and has recently been implicated in SARS-CoV-2 infection (24,  
110 25).

111 In summary, the neuron-astrocyte model appears to have electric activity typical of  
112 mature neurons, correct cell markers, and cells endogenously express viral entry  
113 factors.

114 **Infection of iPSC-derived neural cultures by SARS-CoV-2 is mainly dependent**  
115 **on ACE2 receptor and does not spread efficiently**

116 To assess susceptibility of iPSC-derived human neural cultures to SARS-CoV-2, we  
117 infected 30-day-old neuron-astrocyte co-cultures with the ancestral SARS-CoV-2  
118 Wuhan strain and analyzed samples by immunofluorescence analysis of viral protein  
119 expression at various time points. A representative image of an infected well at 48  
120 hours post infection (hpi) stained with DNA dye Hoechst 33342 (nuclear marker),  
121 neuronal-specific marker microtubule-associated protein 2 (MAP2), and SARS-CoV-2  
122 nucleocapsid protein (N) is given in Fig. 2A, with an enlarged area shown in Fig. 2B.  
123 The viral N protein is distributed both in the cell body, the soma, and throughout  
124 neurites (dendrites), (Fig. 2B, arrow heads).

125 ACE2 receptor is the primary receptor used by SARS-CoV-2 to enter cells (26). Some  
126 of the earliest studies on SARS-CoV-2 have challenged the possibility for SARS-CoV-  
127 2 infection in the central nervous system due to the low ACE2 mRNA levels found in  
128 the human brain (27, 28). Since then, other studies have found robust ACE2 protein  
129 expression in human neurons (7, 29), with Song et al. further reporting that application  
130 of anti-ACE2 antibody prior to infection could block SARS-CoV-2 in human brain  
131 organoids. We found that SARS-CoV-2 is able to infect neurons but not astrocytes. To  
132 test whether SARS-CoV-2 infection of human iPSC-derived neurons is dependent on  
133 ACE2, we treated the cells with different concentrations of anti-ACE2 antibody (2  
134 ug/mL, 5 ug/mL, 20 ug/mL) 1 h prior to infection with SARS-CoV-2 (1.5 MOI). At 24 h,  
135 the application of anti-ACE2 Ab significantly blocked the infection in neurons in a dose-  
136 dependent manner (Fig. 2C). At 48 h, application of anti-ACE2 Ab was less effective  
137 (Fig. 2D), perhaps due to the consumption of the antibody by the cells. Overall, these  
138 data confirm previous findings that the neuronal SARS-CoV-2 infection is at least  
139 partly ACE2- dependent, which is similar to SARS-CoV-2 infection in other cell types  
140 (30, 31).

141 Following the infection with SARS-CoV-2 at a multiplicity of infection (MOI) of 1.5, we  
142 found a low level of infection (around 0.05%) at all time points we analyzed (24, 48  
143 and 120 h) (Fig. 2E). All of the N-positive cells demonstrated robust staining for  
144 neuronal-specific marker MAP2, suggesting that all of the infected cells were neurons.  
145 No astrocytes (defined as MAP2 negative cells) were infected in the experiment. Our  
146 data support previous findings where neurons, but not astrocytes, are susceptible to  
147 SARS-CoV-2 infection in human iPSC-derived cultures (9, 11, 12, 14). Some previous  
148 studies observed SARS-CoV-2 infection in astrocytes, too (13, 15). However, both  
149 studies that found SARS-CoV-2 infection of astrocytes have used a faster cell

150 differentiation protocol with the astrocytes attaining a more immature morphology than  
151 the astrocytes used in our study. Since it has been shown that neural progenitor cells  
152 (NPCs) are susceptible to SARS-CoV-2 infection (7, 14), it is possible that the maturity  
153 of astrocytes may affect their infectability, with more immature astrocytes being more  
154 vulnerable to SARS-CoV-2 infection. We, therefore, focused on determining the  
155 infectious entry pathway of SARS-CoV-2 in neurons.

156 The level of the neuronal SARS-CoV-2 infection did not differ significantly between the  
157 analyzed time points (one-way ANOVA, Fig. 2E), which is in line with a previous study  
158 (12). It is also interesting that even though the infection stage of the N+ cells was not  
159 always the same at a specific time point, we could still observe emergence of a pattern.  
160 At 24 h, the infection was mostly localized in the neuronal soma, with proximal  
161 dendrites beginning to display a sign of infection (Fig. 2F). At 48 h, it was common to  
162 see fully infected cells, with all the neurites showing a robust positivity for SARS-CoV-  
163 2 N (Fig. 2G). At 120 h, all the cells that were found positive for N had their neurites  
164 retracted, which is a sign of a severely diseased state (Fig. 2H).

165 Since previous work by Wang et al. demonstrated that the presence of astrocytes  
166 exacerbates neuronal susceptibility to SARS-CoV-2 infection in human iPSC neuronal  
167 cells (13), we challenged iPSC-derived neuronal monocultures with a similar dose of  
168 SARS-CoV-2 that we used to infect neuron-astrocyte co-cultures. The level of infection  
169 in neuronal monocultures was comparable to the level of infection in neuron-astrocyte  
170 co-cultures, suggesting that astrocytes do not facilitate neuronal SARS-CoV-2  
171 infection in these cultures (Fig. 2I).

172 Additionally, we confirmed colocalization of anti-N and anti-double stranded RNA  
173 (dsRNA) antibodies (Ab) in the infected samples, demonstrating presence of both viral  
174 protein and viral RNA material (Fig. 2J and 2K). To check whether the infection of



175 neurons is productive, we carried out qRT-PCR analysis of the medium collected from  
176 the cells at 0, 24, 48 and 120 hpi. We observed that viral genome was released into  
177 the medium, with the maximum load detected at 48 hpi (Fig. 2L).

### 178 **Virus infection is blocked by inhibition of PIK5K but not serine proteases**

179 To infect cells, SARS-CoV-2 surface protein spike (S) has to be cleaved by cellular  
180 proteases, which is followed by fusion of the virus with the membrane of the cell or its  
181 components. Previous studies reported that SARS-CoV-2 could infect human primary  
182 cells: 1) through endocytosis, spike activation by cathepsin-L and fusion of the virus  
183 with lysosomes, or 2) through activation of the spike by transmembrane serine  
184 protease 2 (TMPRSS2) and direct fusion with the plasma membrane (21, 22, 32). To  
185 investigate which route of infection is utilized by SARS-CoV-2 in human iPSC-derived  
186 neurons, we used drugs to block these pathways, alone or in combination. Apilimod  
187 blocks 1-phosphatidylinositol 3-phosphate 5-kinase (PIK5K) and therefore disrupts  
188 endosomal/lysosomal trafficking, which has previously been shown to block viral  
189 infections, including Ebola and SARS-CoV-2 (33–35). It eliminated SARS-CoV-2  
190 infection in neurons at 24 h (Fig. 3A) and significantly reduced it at 48 h when applied  
191 1 h prior to infection with SARS-CoV-2 at 1.5 MOI (Fig. 3B). Nafamostat, that inhibits  
192 serine proteases and prevents the virus from entering the cells directly from the  
193 plasma membrane, did not block the infection (Fig. 3A and 3B). A combination of both  
194 drug types had an effect similar to apilimod alone (Fig. 3 A and 3B).

195 Since our initial level of infection in neurons was low, we decided to check whether an  
196 increase in the viral titer might increase the level of infection. Therefore, we infected  
197 the cells with SARS-CoV-2 at MOI of 15 and evaluated the infection at 48 hpi. While  
198 we observed around a 10-fold increase in the infection of the cells, the overall infection  
199 rate was still low (around 0.5%) (Fig. 3C). Camostat, another serine protease inhibitor

200 analogous to nafamostat, had no effect on infectivity of SARS-CoV-2 in neuronal cells,  
201 while apilimod (alone or in combination with camostat) robustly blocked the infection.

202

203 To control for the overall effectiveness of the drugs, we used the Caco-2 cell line  
204 expressing ACE2 receptor. We treated the cells with similar concentrations of apilimod  
205 and nafamostat and infected the cells with SARS-CoV-2 at 2.5 MOI 1 h post treatment.

206 While apilimod had only a small effect on the infection rates in Caco-2 cells,  
207 nafamostat rendered a remarkable decrease in the infection levels in Caco-2 cells,  
208 confirming previous data that cell surface serine protease inhibitors are capable of  
209 blocking SARS-CoV-2 entry in cells where this route is available for the virus (Fig. 3D).

210 Since neuronal infection was blocked by an inhibitor of the host factor phosphatidyl-  
211 inositol 5 kinase but not by inhibitors of cell surface serine proteases, these data  
212 suggest that SARS-CoV-2 infection of iPSC-derived neurons preferentially occurs  
213 through the endosomal pathway and not through direct fusion with the plasma  
214 membrane preceded by TMPRSS2-mediated cleavage. Therefore, drugs that disrupt  
215 viral entry through the endosomal/lysosomal pathway could possibly be used in  
216 preventive care or soon after the exposure to the virus. However, we warn against  
217 hasty or incautious use of such drugs. In our *in vitro* experiments, apilimod negatively  
218 affected the morphology of neurons by causing neurite truncation (Fig. 3E). Thus,  
219 apilimod has served as a useful tool to evaluate the SARS-CoV-2 entry pathway, but  
220 it is an unlikely candidate for clinical trials unless it is carefully tested safety in  
221 preclinical studies *in vivo*.

222

223

224

## 225 **Conclusions**

226 The current study has characterized SARS-CoV-2 infection in human iPSC-derived  
227 cortical neurons and provided evidence that neurons but not astrocytes get infected  
228 even at higher viral doses. The infection relies on ACE2 for entry and it is productive.  
229 When entering the neuronal cells, the virus preferentially uses the  
230 endosomal/lysosomal pathway. SARS-CoV-2 requires at least three factors to infect  
231 cells: 1) a receptor (e.g. ACE2), 2) a protease to activate the fusogenic activity of the  
232 spike (e.g. cathepsins in endo/lysosomes or TMPRSS2 at cell surface), and 3) a pH <  
233 6.8 (23). While the average pH of human nasal mucosa is indeed around 6.6 (23),  
234 potentially allowing virus fusion at the PM, the pH of extracellular fluids in the brain is  
235 rather neutral, above 7.2 (36). It is therefore conceivable that the virus requires  
236 endocytosis and access to acidic endosomes to infect neurons. Drugs that inhibit any  
237 of these steps could potentially be used in preventive care or soon after the infection  
238 exposure to prevent or limit neuron infection, respectively.

239 Very low-level infection in the brain might not be easily traced, especially if not lethal.  
240 However, even low-level infection could lead to long-lasting negative consequences.  
241 Although the infection led to neuronal cell death within 120 h *in vitro*, we do not know  
242 how long an infected neuron could release viruses and survive *in vivo*. A deeper  
243 understanding of brain infection by SARS-CoV-2 could, on the one hand, help  
244 understand if there is a casual connection between the virus infection of brain cells  
245 and the neurological manifestations associated with Long COVID. On the other hand,  
246 a more detailed molecular characterization of the virus entry pathways and  
247 mechanisms of assembly and release are needed to develop treatments against  
248 COVID-19-associated neurological complications.

249

## 250 **Materials and methods**

### 251 **Generation and culturing of human iPSCs**

252 Punch skin biopsies were collected from Finnish healthy males after informed consent.  
253 The study has received acceptance from the Research Ethics Committee of the  
254 Northern Savo Hospital District (license no. 123.13.02.00/2016). Skin fibroblasts were  
255 expanded in fibroblast culture media (Iscove's DMEM, 20% fetal bovine serum, 1%  
256 penicillin-streptomycin and 1% non-essential amino acids) as described previously  
257 (37) and transduced using CytoTune™ –iPS 2.0 Sendai Reprogramming kit  
258 (ThermoFisher Scientific) according to manufacturer's instructions. Fibroblast culture  
259 medium was replaced with Essential 6 Medium (E6 supplement, ThermoFisher  
260 Scientific) supplemented with 100 ng/ml basic fibroblast growth factor (bFGF,  
261 Peprotech) at day 6 post-transduction. Reprogrammed iPSC colonies were selected  
262 based on morphology at three weeks post-transduction and expanded on Matrigel  
263 (growth-factor reduced, Corning) in Essential 8 (E8) Medium at 37°C / 5% CO<sub>2</sub>.  
264 Cultures were passaged with 0.5 mM EDTA approximately twice a week. The  
265 pluripotency of newly generated hiPS cells was verified by immunocytochemistry for  
266 stage-specific embryonic antigen 4 (SSEA-4), octamer-binding transcription factor 4  
267 (Oct4), Nanog, and TRA-1-81 (Supplementary Figure 1). All used iPSC lines are listed  
268 in Supplementary Table 1.

### 269 **hiPSC-derived NGN2-neurons**

270 hiPSC-derived neurons were generated according to the protocol adapted from  
271 Nehme et. al. 2018 (38). Briefly, hiPSCs were transduced with a lentivirus containing  
272 the NGN2-gene under tetracycline-inducible promotor (Tet-O-Ngn2-Puro) in  
273 combination with lentivirus carrying FUDeltaGW-rtTA construct (both plasmids from  
274 Addgene, lentivirus packing and concentration by Alstem) at MOI 10 for 1 h. The

275 construct contains a puromycin-resistance gene, which allows for selection of neural  
276 precursor cells (NPCs). After transduction, the virus was removed, and the cells were  
277 cultured normally on Matrigel (growth-factor reduced, Merck) -coated 35 mm culture  
278 plates in E8-medium (Gibco) + 50 U/ml penicillin + 50 µg/ml streptomycin). NGN2-  
279 transduced iPSCs were expanded under normal hiPSC culture conditions and stock  
280 vials were frozen in 10% DMSO (Sigma), 10% fetal bovine serum (Biowest) in culture  
281 medium.

282 For neuronal differentiation, a vial of NGN2-transduced hiPSCs was thawed and  
283 passaged 1-3 times under normal culture conditions prior to use. On day 0, neuronal  
284 differentiation was initiated by adding 2 µg/ml doxycycline to E8 medium on a 60-70%  
285 confluent NGN2-iPSC plate. On day 1, medium was switched to N2-medium  
286 (DMEM/F12 without L-glutamine, 1%, Glutamax, 1% N2 (all from Gibco), 0.3%  
287 glucose) supplemented with 2 µg/ml doxycycline (BioGems) and dual SMAD inhibitors  
288 0.1 µM LDN-193189 (Sigma), 10 µM SB-431542B (Sigma), 2 µM Xav939 (BioGems).  
289 On day 2, developing NPCs were selected by adding 5 µg/ml puromycin  
290 (ThermoFisher Scientific). On day 3, puromycin was removed, dead cells were  
291 washed away with base medium and the cells were returned to N2-medium  
292 supplemented with 2 µg/ml doxycycline, 0.1 µM LDN-193189, 10 µM SB-431542B, 2  
293 µM Xav939. On day 4, emerging neurons were plated with or without astrocytes on  
294 0.9 - 13 mm coverslips or glass-bottom 96-well plates coated with 9-16 µg/cm<sup>2</sup> poly-  
295 d-lysine and ~1.5 µg/cm<sup>2</sup> laminin (from mouse Engelbreth-Holm-Swarm (EHS)  
296 sarcoma; Sigma). Density was 50 000 cells / cm<sup>2</sup>/ cell type. Medium was switched to  
297 Neurobasal (Gibco) supplemented with 1% Glutamax (Gibco), 2% B27 without vitamin  
298 A (Gibco), 50 µM non-essential amino acids (Gibco), 0.3% glucose, and 10 ng/ml  
299 GDNF, BDNF and CNTF (Peprotech). Day 7: proliferation was inhibited with an

300 overnight 10  $\mu$ M floxuridine (Tocris) -treatment. The cells were matured for 4-6  
301 weeks with 50% medium changes three times a week.

### 302 **hiPSC-derived astrocytes**

303 Astrocyte differentiation was initiated by growing confluent hiPSC plate in Neural  
304 Maturation Medium (Neurobasal, DMEM/12 without L-glutamine, 1.7% Glutamax, 50  
305  $\mu$ M non-essential amino acids, 0.5 mM sodium pyruvate, 0.5% N2, 1% B27 with  
306 vitamin A, 50  $\mu$ M beta-mercaptoethanol, 2.5  $\mu$ g/ml insulin, 50 U/ml penicillin, 50  $\mu$ g/ml  
307 streptomycin) supplemented with dual SMAD inhibitors 10  $\mu$ M SB-431542B and 200  
308  $\mu$ M LDN-193189 for 10-12 days. Resulting NPCs were split 1:2 by scraping and plated  
309 on 1.5  $\mu$ /cm<sup>2</sup> laminin-coated 35 mm cell culture dishes. The NPCs were expanded for  
310 2-4 days in NMM supplemented with 20 ng/ml bFGF. Then the cells were detached  
311 and moved to ultra-low attachment plates (Corning) in Astrodifferentiation medium  
312 (DMEM/F12 without L-glutamine, 1% Glutamax, 50  $\mu$ M non-essential amino acids, 1%  
313 N2, 50 U/ml penicillin, 50  $\mu$ g/ml streptomycin, 0.5 U/ml heparin) supplemented with  
314 10 ng/ml bFGF and EGF. Astrospheres were cultured for 6 months and cut manually  
315 when necessary. For experiments, astrospheres were dissociated with StemPro  
316 Accutase for 10 min, triturated into a single-cell suspension and plated on culture  
317 dishes. For characterization, astrocytes were plated on growth factor-reduced Matrigel  
318 (Corning) at density 50 000 cells/cm<sup>2</sup> and matured in Astrodifferentiation medium  
319 supplemented with 10 ng/ml BMP-4 & CNTF.

### 320 **Immunocytochemistry for cell type characterization**

321 Cell cultures were fixed with 4% paraformaldehyde (PFA) and washed twice with PBS.  
322 Cells were permeabilized for 20 min with 0.25% Triton X-100 in PBS or left  
323 unpermeabilized (SSEA-4 and TRA-1-81). Unspecific binding was blocked with 5%  
324 normal goat serum in PBS (blocking buffer). Primary antibodies were diluted in

325 blocking buffer and incubated overnight in 4°C. The next day, the samples were  
326 washed 3 x 10 min with PBS. Secondary antibodies were diluted 1:1000 in blocking  
327 buffer and incubated for 1 h at room temperature (RT). Samples were washed 3 x 10  
328 min with PBS and stained with nuclear marker DAPI prior to mounting with  
329 Fluoromount. Characterization was done for six neuronal cell lines (N=6) and four  
330 astrocyte cell lines (N=4).

### 331 **Immunohistochemistry for virus-infected samples**

332 The cells were fixed with 4% PFA in PBS at RT for 20 min. PFA was removed, and  
333 the cells were incubated in PBS at 4° C until the staining was performed. The virus  
334 was inactivated with ultraviolet radiation (5000 J/m<sup>2</sup> dose) before removal of the  
335 samples from BSL-3. Before permeabilization, the cells were incubated in 50 mM  
336 ammonium chloride (NH<sub>4</sub>Cl) in PBS to quench free aldehyde groups remaining post  
337 fixation at RT for 20 min. Then the cells were permeabilized with 0.1% Triton-X in PBS  
338 and the nuclei were stained with 1:1000 Hoechst 33342 in Dulbecco medium  
339 containing 0.2% bovine serum albumin (BSA-Dulbecco) for 10 min. The cells were  
340 washed once with 0.2% BSA-Dulbecco and incubated in primary Ab at 4° C overnight.  
341 On the following day, the cells were washed twice with 0.2% BSA-Dulbecco and  
342 incubated in fluorescent dye-conjugated secondary antibodies for 1 hour at RT. After  
343 that, the cells were washed with 0.2% BSA-Dulbecco three times and 100 µl of PBS  
344 per well was added.

### 345 **Antibodies**

346 Full list of antibodies used in the study is provided in Supplementary Table 2.

### 347 **Microelectrode array (MEA)**

348 Electric activity of neuron astrocyte-cocultures was assessed using the Maestro Edge  
349 multi-well microelectrode array system (Axion). The cells were plated on 24-well

350 Cytoview MEA plates (Axion) at density 60 000 neurons + 60 000 astrocytes per well  
351 and cultured for 3 weeks prior to starting the recordings. Each well contained 16  
352 electrodes per well with 50  $\mu$ m electrode diameter and 350  $\mu$ m electrode spacing. The  
353 activity was recorded at 37°C / 5% CO<sub>2</sub> for 10 min until day 35. The signal was sampled  
354 at frequency 12.5 Hz and filtered with digital low pass filter 3 kHz Kaiser Window and  
355 digital high pass filter 200 Hz IIR. The noise threshold was set at 5 standard deviations.  
356 Bursts were detected with the following inter spike interval (ISI) threshold settings:  
357 minimum number of spikes: 10; maximum interspike interval: 100 ms. Network bursts  
358 were detected with the following settings: minimum number of spikes: 90; maximum  
359 interspike interval: 20 ms; minimum percentage of participating electrodes: 33%.  
360 Characterization was done using five cell lines (N=5) and all values were calculated  
361 as a mean of three wells.

### 362 **qRT-PCR to assess RNA expression of astrocyte markers and cell surface** 363 **receptors**

364 Levels of ACE2, GFAP, S100 $\beta$  NRP1 and TMPRSS2 receptors in our hiPSC-derived  
365 neurons, astrocytes, and neuronal precursor cells (NPCs) were assessed with qRT-  
366 PCR. First, RNA was isolated from cultured neurons, astrocytes, NPCs and iPSCs  
367 using RNeasy mini kit (Qiagen) following manufacturer's instructions. The  
368 concentration of RNA was measured using NanoDrop and 500 ng of RNA was  
369 converted into cDNA. First, 500 ng of RNA was diluted in water and mixed with  
370 Random hexamer primer (ThermoFisher Scientific). The samples were incubated 5  
371 min at 65°C in C1000 Thermal Cycler (Bio-Rad). Then, a synthesis mixture (10 mM  
372 dNTP, ribonuclease inhibitor and Maxima reverse transcriptase in reaction buffer  
373 (ThermoFisher Scientific) was added to the samples and cDNA synthesis was run for  
374 30 min in 50°C. Quantitative RT-PCR was run using Maxima probe/ROX qPCR master



375 mix and the following TaqMan® primers: *ACE2* (HS01085333\_m1), *GAPDH*  
376 (Hs99999905\_m1), *GFAP* (Hs00909233\_m1), *Neuropilin-1* (Hs00826128\_m1),  
377 *S100β* (Hs00902901\_m1), *TMPRSS2* (HS01122322\_m1) (Thermo Fisher Scientific)  
378 on Bio-Rad CFX96 Real-Time System (Bio-Rad). The samples were run at 95°C for  
379 10 min followed by 40 cycles of 95°C 15 s, 60°C 30 s, and 72°C 30 s. The results were  
380 normalized to human *GAPDH* expression using the Q-gene program (Equation 2) (39).  
381 qRT-PCR was repeated for tree cell lines each (N=3) with two exceptions: four (N=4)  
382 and two (N=4) astrocyte cell lines were used to assess *ACE2* and *NRP1* RNA  
383 expression, respectively.

#### 384 **qRT-PCR to assess viral release**

385 SARS-CoV-2 RNA was harvested from the cell medium at various time points post  
386 infection and stored in viral lysis buffer with RNA supplements (50 µl of sample  
387 medium in 560 µl of AVL buffer supplemented with 1% carrier RNA) (Qiagen). RNA  
388 was extracted using QIAamp Viral RNA Mini Kit (Qiagen). RNA concentration and  
389 quality were evaluated using NanoDrop 2000 Spectrophotometer (ThermoFischer  
390 Scientific). qRT-PCR was run in triplicates using reverse transcriptase- and template-  
391 negative controls and TaqMan Fast Virus 1-step MasterMix by Thermo Fischer  
392 Scientific (5 µl of the sample in 20 µl of total volume). Primers and probe used for the  
393 reaction were ordered from Metabion: RdRP-SARSr-F2: 5'- GTG ARA TGG TCA TGT  
394 GTG GCG G -3' as the forward primer, RdRP-SARSr-R2: 5' - CAR ATG TTA AAS  
395 ACA CTA TTA GCA TA - 3 as the reverse primer', RdRP-SARSr-P2: 5'- 6 - Fam - CAG  
396 GTG GAA CCT CAT CAG GAG ATG C -BHQ - 1 - 3' as the probe. The qRT-PCR  
397 reaction was run with AHDiagnosics Agilent Technologies Stratagene Mx3005P using  
398 the following steps: reverse transcription for 5 min at 50°C, initial denaturation for 20

399 s at 95°C and two amplification steps at 95°C for 3 s and 60°C for 30 s (the  
400 amplifications steps were repeated for 40 cycles).

#### 401 **SARS-CoV-2 virus**

402 Wuhan strain of SARS-CoV-2 virus produced in Vero E6 cells was used in all the  
403 experiments.

#### 404 **Anti-ACE2 antibody treatment**

405 Different concentrations of anti-ACE2 Ab (low – 2 µg/ml, medium – 5 µg/ml, high – 20  
406 µg/ml) were added to the cells 30 min. prior to the infection with the virus.

#### 407 **Drug treatment**

408 The cells were treated with 0.25 µM, 1 µM, 2 µM apilimod dimesylate (Tocris, ref.  
409 #7283, batch 1A/257560), 50 µM camostat mesylate (Tocris, ref. #3193, batch  
410 2B/242261), 25 µM nafamostat mesylate (Tocris, ref. #3081, batch 6A/257562) or  
411 combinations of these drugs 30 min prior to the infection with the virus.

#### 412 **Virus Infections**

413 Experiments involving infection of cells with SARS-CoV-2 were performed in BSL-3  
414 facility of the University of Helsinki under all required university permissions. Infection  
415 of cells was performed in Neurobasal media (Gibco) supplemented with 1%  
416 Glutamax, 2% B27 without vitamin A, 50 µM non-essential amino acids, 0.3% glucose,  
417 and 10 ng/ml GDNF, BDNF and CNTF. Before application to the cells, SARS-CoV-2  
418 was pre-incubated in the neurobasal medium at 37° C for 30 min. After the infection,  
419 the cells were incubated at 37° C with 5% CO<sub>2</sub> supplementation for 24, 48 or 120 h.  
420 For Caco-2 cell experiment, infection was carried out in Dulbecco's Modified Eagle's  
421 Medium (Sigma, D6546) supplemented with 4500 mg / L glucose, sodium pyruvate,  
422 sodium bicarbonate, 1% L-glutamine, 1% NEAA, 2% fetal bovine serum, penicillin and  
423 streptomycin.

## 424 **High-throughput imaging to detect the virus**

425 High-throughput imaging was carried out using ImageXpress Nano microscope  
426 (Molecular Devices) at the Light Microscopy Unit of University of Helsinki. We used  
427 two Nikon objectives: 10x/0.3 Plan Fluor, WD 16 mm (pixel size 0.655  $\mu\text{m}$ ) and  
428 20x/0.45 S Plan Fluor ELWD, WD 8.2-6.9 mm (pixel size 0.328  $\mu\text{m}$ ). Detailed  
429 information on the filter specifications for different channels can be found at  
430 <https://wiki.helsinki.fi/display/LMU/MolecularDevices+Nano>.

## 431 **Image Analysis**

432 High-throughput image analysis was carried out using Cell Profiler 4 (40).  
433 Approximately 10000 cells per sample were analyzed. First, the nuclei were identified  
434 on the image channel dyed with Hoechst 33342 by providing a typical diameter of the  
435 objects using Otsu thresholding method. Then the objects identified as nuclei were  
436 expanded by a few pixels to approximately represent the borders of a cell. The channel  
437 with the MAP2/Tubulin-3 staining was overlaid with the expanded nuclei, and a  
438 threshold for an average signal intensity of MAP2/Tubulin-3+ cells was chosen. The  
439 expanded nuclei displaying an intensity of the MAP2/Tubulin-3+ staining channel  
440 above the chosen threshold were classified as neurons, while the cells with the  
441 intensity below were classified as astrocytes. Both classes of cells were overlaid with  
442 an image channel where staining for the virus N-protein was carried out. Cell bodies  
443 demonstrating intensity of staining above a defined threshold were counted as virus-  
444 positive cells. Percentage of cells positive for the virus N-protein from the total  
445 population of the cells of their cell type was plotted. For the control experiment in Caco-  
446 2 cells, the pipeline was similar, but no cell type-specific markers were used as the  
447 cell line was homogeneous.

## 448 **Statistical analysis**

449 Statistical analysis of the data was performed in GraphPad Prism 6. ROUT test was  
450 performed before the analysis to identify outliers. Two-tailed unpaired Student's t-test  
451 was performed when two conditions were compared. One-way ANOVA was used  
452 when more than two groups were analyzed. When the main effect was found  
453 statistically significant, post-hoc multiple comparisons tests were carried out.  
454 Differences were considered statistically significant when  $p < 0.05$ . Data in figures are  
455 presented as mean  $\pm$  SEM.

#### 456 **Data availability**

457 We are in the process of submitting the data underlying the current research into a  
458 public repository. DOIs of the original research data will be included into the  
459 manuscript text before the official publication.

460

#### 461 **Acknowledgments**

462 We thank Ida Hyötyläinen, Laila Kaskela, Eila Korhonen, Jenni Voutilainen for the work  
463 they have done on iPSC characterization. The study was supported by the Sigrid  
464 Juselius Foundation (J.K., Š.L.), The Academy of Finland (Grant 334525, JK),  
465 University of Helsinki Graduate Program in Microbiology and Biotechnology (R.O.),  
466 Academy of Finland Research Grants 335527 (G.B., A.L. and R.O.) and 336490, Jane  
467 and Aatos Erkko Foundation (O.V., Š.L.), Helsinki University Hospital funds  
468 TYH2021343 (O.V.), European Union's Horizon Europe research and innovation  
469 program grant 101057553 (G.B., O.V.) and University of Helsinki Doctoral Programme  
470 Brain & Mind (P.K). The funders had no role in the study design, data collection and  
471 interpretation. High-throughput imaging was performed at Light Microscopy Unit of the  
472 University of Helsinki. The authors declare no competing interests.

473

474 **References**

- 475 1. Chen R, Wang K, Yu J, Howard D, French L, Chen Z, Wen C, Xu Z. 2021. The  
476 Spatial and Cell-Type Distribution of SARS-CoV-2 Receptor ACE2 in the  
477 Human and Mouse Brains. *Front Neurol* 11:1860.
- 478 2. Douaud G, Lee S, Alfaro-Almagro F, Arthofer C, Wang C, McCarthy P, Lange  
479 F, Andersson JLR, Griffanti L, Duff E, Jbabdi S, Taschler B, Winkler AM,  
480 Nichols TE, Collins R, Matthews PM, Allen N, Miller KL, Smith SM. 2021. Brain  
481 imaging before and after COVID-19 in UK Biobank. *medRxiv*  
482 2021.06.11.21258690.
- 483 3. Matschke J, Lütgehetmann M, Hagel C, Sperhake JP, Schröder AS, Edler C,  
484 Mushumba H, Fitzek A, Allweiss L, Dandri M, Dottermusch M, Heinemann A,  
485 Pfefferle S, Schwabenland M, Sumner Magruder D, Bonn S, Prinz M, Gerloff  
486 C, Püschel K, Krasemann S, Aepfelbacher M, Glatzel M. 2020.  
487 Neuropathology of patients with COVID-19 in Germany: a post-mortem case  
488 series. *Lancet Neurol* 19:919–929.
- 489 4. Meinhardt J, Radke J, Dittmayer C, Franz J, Thomas C, Mothes R, Laue M,  
490 Schneider J, Brünink S, Greuel S, Lehmann M, Hassan O, Aschman T,  
491 Schumann E, Chua RL, Conrad C, Eils R, Stenzel W, Windgassen M, Rößler  
492 L, Goebel HH, Gelderblom HR, Martin H, Nitsche A, Schulz-Schaeffer WJ,  
493 Hakroush S, Winkler MS, Tampe B, Scheibe F, Körtvélyessy P, Reinhold D,  
494 Siegmund B, Kühl AA, Elezkurtaj S, Horst D, Oesterhelweg L, Tsokos M,  
495 Ingold-Heppner B, Stadelmann C, Drosten C, Corman VM, Radbruch H,  
496 Heppner FL. 2020. Olfactory transmucosal SARS-CoV-2 invasion as a port of  
497 central nervous system entry in individuals with COVID-19. *Nature*  
498 *Neuroscience* 2020 24:2 24:168–175.

- 499 5. Puelles VG, Lütgehetmann M, Lindenmeyer MT, Sperhake JP, Wong MN,  
500 Allweiss L, Chilla S, Heinemann A, Wanner N, Liu S, Braun F, Lu S, Pfefferle  
501 S, Schröder AS, Edler C, Gross O, Glatzel M, Wichmann D, Wiech T, Kluge S,  
502 Pueschel K, Aepfelbacher M, Huber TB. 2020. Multiorgan and Renal Tropism  
503 of SARS-CoV-2. *N Engl J Med* 383:590–592.
- 504 6. Serrano GE, Walker JE, Arce R, Glass MJ, Vargas D, Sue LI, Intorcchia AJ,  
505 Nelson CM, Oliver J, Papa J, Russell A, Suszczewicz KE, Borja CI, Belden C,  
506 Goldfarb D, Shprecher D, Atri A, Adler CH, Shill HA, Driver-Dunckley E, Mehta  
507 SH, Readhead B, Huentelman MJ, Peters JL, Alevritis E, Bimi C, Mizgerd JP,  
508 Reiman EM, Montine TJ, Desforges M, Zehnder JL, Sahoo MK, Zhang H, Solis  
509 D, Pinsky BA, Deture M, Dickson DW, Beach TG. 2021. Mapping of SARS-  
510 CoV-2 Brain Invasion and Histopathology in COVID-19 Disease. *medRxiv*  
511 2021.02.15.21251511.
- 512 7. Song E, Zhang C, Israelow B, Lu-Culligan A, Prado AV, Skriabine S, Lu P,  
513 Weizman O el, Liu F, Dai Y, Szigeti-Buck K, Yasumoto Y, Wang G, Castaldi C,  
514 Heltke J, Ng E, Wheeler J, Alfajaro MM, Levavasseur E, Fontes B, Ravindra  
515 NG, van Dijk D, Mane S, Gunel M, Ring A, Jaffar Kazmi SA, Zhang K, Wilen  
516 CB, Horvath TL, Plu I, Haik S, Thomas JL, Louvi A, Farhadian SF, Huttner A,  
517 Seilhean D, Renier N, Bilguvar K, Iwasaki A. 2021. Neuroinvasion of SARS-  
518 CoV-2 in human and mouse brain. *J Exp Med* 218.
- 519 8. Crunfli F, Carregari VC, Veras FP, Vendramini PH, Valença AGF, Antunes  
520 ASLM, Brandão-Teles C, Zuccoli G da S, Reis-de-Oliveira G, Silva-Costa LC,  
521 Saia-Cereda VM, Smith BJ, Codo AC, Souza GF de, Muraro SP, Parise PL,  
522 Toledo-Teixeira DA, Castro ÍMS de, Melo BMS, Almeida GM, Firmino EMS,  
523 Paiva IM, Silva BMS, Guimarães RM, Mendes ND, Ludwig RG, Ruiz GP,

- 524 Knittel TL, Davanzo GG, Gerhardt JA, Rodrigues PB, Forato J, Amorim MR,  
525 Silva NB, Martini MC, Benatti MN, Batah S, Siyuan L, João RB, Silva LS,  
526 Nogueira MH, Aventurato ÍK, Brito MR de, Alvim MKM, Júnior JR da S,  
527 Damião LL, Sousa IMP de, Rocha ED da, Gonçalves SM, Silva LHL da, Bettini  
528 V, Campos BM de, Ludwig G, Tavares LA, Pontelli MC, Viana RMM, Martins  
529 R, Vieira AS, Alves-Filho JC, Arruda E, Podolski-Gondim G, Santos MV, Neder  
530 L, Cendes F, Louzada-Junior P, Oliveira RD, Cunha FQ, Damásio A, Vinolo  
531 MAR, Munhoz CD, Rehen SK, Nakaya HI, Mauad T, Duarte-Neto AN, Silva  
532 LFF da, Dolhnikoff M, Saldiva P, Farias AS, Moraes-Vieira PMM, Fabro AT,  
533 Sebollela AS, Módena JLP, Yasuda CL, Mori MA, Cunha TM, Martins-de-  
534 Souza D. 2022. Morphological, cellular and molecular basis of brain infection  
535 in COVID-19 patients. medRxiv 2020.10.09.20207464.
- 536 9. Bauer L, Lendemeijer B, Leijten L, Embregts CWE, Rockx B, Kushner SA, de  
537 Vrij FMS, van Riel D. 2021. Replication Kinetics, Cell Tropism, and Associated  
538 Immune Responses in SARS-CoV-2- and H5N1 Virus-Infected Human  
539 Induced Pluripotent Stem Cell-Derived Neural Models. mSphere 6.
- 540 10. Bullen CK, Hogberg HT, Bahadirli-Talbott A, Bishai WR, Hartung T, Keuthan  
541 C, Looney MM, Pekosz A, Romero JC, Sillé FCM, Um P, Smirnova L. 2020.  
542 Infectability of human BrainSphere neurons suggests neurotropism of SARS-  
543 CoV-2. ALTEX - Alternatives to animal experimentation 37:665–671.
- 544 11. Lyoo KS, Kim HM, Lee B, Che YH, Kim SJ, Song D, Hwang W, Lee S, Park  
545 JH, Na W, Yun SP, Kim YJ. 2022. Direct neuronal infection of SARS-CoV-2  
546 reveals cellular and molecular pathology of chemosensory impairment of  
547 COVID-19 patients. Emerg Microbes Infect 11:406–411.

- 548 12. Ramani A, Müller L, Ostermann PN, Gabriel E, Abida-Islam P, Müller-  
549 Schiffmann A, Mariappan A, Goureau O, Gruell H, Walker A, Andrée M, Hauka  
550 S, Houwaart T, Dilthey A, Wohlgemuth K, Omran H, Klein F, Wieczorek D,  
551 Adams O, Timm J, Korth C, Schaal H, Gopalakrishnan J. 2020. SARS-CoV-2  
552 targets neurons of 3D human brain organoids. *EMBO J* 39:e106230.
- 553 13. Wang C, Zhang M, Garcia G, Tian E, Cui Q, Chen X, Sun G, Wang J,  
554 Arumugaswami V, Shi Y. 2021. ApoE-Isoform-Dependent SARS-CoV-2  
555 Neurotropism and Cellular Response. *Cell Stem Cell* 28:331.
- 556 14. Zhang BZ, Chu H, Han S, Shuai H, Deng J, Hu Y fan, Gong H rui, Lee ACY,  
557 Zou Z, Yau T, Wu W, Hung IFN, Chan JFW, Yuen KY, Huang JD. 2020.  
558 SARS-CoV-2 infects human neural progenitor cells and brain organoids. *Cell*  
559 *Research* 2020 30:10 30:928–931.
- 560 15. Jacob F, Pather SR, Huang WK, Zhang F, Wong SZH, Zhou H, Cubitt B, Fan  
561 W, Chen CZ, Xu M, Pradhan M, Zhang DY, Zheng W, Bang AG, Song H,  
562 Carlos de la Torre J, Ming G li. 2020. Human Pluripotent Stem Cell-Derived  
563 Neural Cells and Brain Organoids Reveal SARS-CoV-2 Neurotropism  
564 Predominates in Choroid Plexus Epithelium. *Cell Stem Cell* 27:937-950.e9.
- 565 16. Preuss MAR, Faber ML, Tan GS, Bette M, Dietzschold B, Weihe E, Schnell  
566 MJ. 2009. Intravenous inoculation of a bat-associated rabies virus causes  
567 lethal encephalopathy in mice through invasion of the brain via neurosecretory  
568 hypothalamic fibers. *PLoS Pathog* 5.
- 569 17. Schnell MJ, McGettigan JP, Wirblich C, Papaneri A. 2009. The cell biology of  
570 rabies virus: using stealth to reach the brain. *Nature Reviews Microbiology*  
571 2009 8:1 8:51–61.



- 572 18. Dahm T, Rudolph H, Schwerk C, Schroten H, Tenenbaum T. 2016.  
573 Neuroinvasion and Inflammation in Viral Central Nervous System Infections.  
574 Mediators Inflamm 2016.
- 575 19. Bogovic P, Strle F. 2015. Tick-borne encephalitis: A review of epidemiology,  
576 clinical characteristics, and management. World Journal of Clinical Cases :  
577 WJCC 3:430.
- 578 20. Pedrosa C da SG, Goto-Silva L, Temerozo JR, Souza LRQ, Vitória G, Ornelas  
579 IM, Karmirian K, Mendes MA, Gomes IC, Sacramento CQ, Fintelman-  
580 Rodrigues N, Cardoso Soares V, Silva Gomes Dias S da, Salerno JA, Puig-  
581 Pijuan T, Oliveira JT, Aragão LGHS, Torquato TCQ, Veríssimo C, Biagi D,  
582 Cruvinel EM, Dariolli R, Furtado DR, Borges HL, Bozza PT, Rehen S, Moreno  
583 L. Souza T, Guimarães MZP. 2021. Non-permissive SARS-CoV-2 infection in  
584 human neurospheres. Stem Cell Res 54:102436.
- 585 21. Kreuzberger AJB, Sanyal A, Ojha R, Pyle JD, Vapalahti O, Balistreri G,  
586 Kirchhausen T. 2021. Synergistic Block of SARS-CoV-2 Infection by Combined  
587 Drug Inhibition of the Host Entry Factors PIKfyve Kinase and TMPRSS2  
588 Protease. J Virol 95.
- 589 22. Koch J, Uckeley ZM, Doldan P, Stanifer M, Boulant S, Lozach P-Y. 2021.  
590 TMPRSS2 expression dictates the entry route used by SARS-CoV-2 to infect  
591 host cells. EMBO J 40:e107821.
- 592 23. Kreuzberger AJB, Sanyal A, Saminathan A, Bloyet L-M, Stumpf S, Liu Z, Ojha  
593 R, Patjas MT, Geneid A, Scanavachi G, Doyle CA, Somerville E, Bango R,  
594 Cunha Correia D, Caprio G di, Toppila-Salmi S, M€ Akitie A, Kiessling V,  
595 Vapalahti O, Whelan SPJ, Balistreri G, Kirchhausen T, Designed TK, Sanyal  
596 A, Saminathan A, Performed GB. 2022. SARS-CoV-2 requires acidic pH to

- 597 infect cells. Proceedings of the National Academy of Sciences  
598 119:e2209514119.
- 599 24. Daly JL, Simonetti B, Klein K, Chen KE, Williamson MK, Antón-Plágaro C,  
600 Shoemark DK, Simón-Gracia L, Bauer M, Hollandi R, Greber UF, Horvath P,  
601 Sessions RB, Helenius A, Hiscox JA, Teesalu T, Matthews DA, Davidson AD,  
602 Collins BM, Cullen PJ, Yamauchi Y. 2020. Neuropilin-1 is a host factor for  
603 SARS-CoV-2 infection. *Science* (1979) 370:861–865.
- 604 25. Cantuti-Castelvetri L, Ojha R, Pedro LD, Djannatian M, Franz J, Kuivanen S,  
605 van der Meer F, Kallio K, Kaya T, Anastasina M, Smura T, Levanov L,  
606 Szirovicza L, Tobi A, Kallio-Kokko H, Österlund P, Joensuu M, Meunier FA,  
607 Butcher SJ, Winkler MS, Mollenhauer B, Helenius A, Gokce O, Teesalu T,  
608 Hepojoki J, Vapalahti O, Stadelmann C, Balistreri G, Simons M. 2020.  
609 Neuropilin-1 facilitates SARS-CoV-2 cell entry and infectivity. *Science* (1979)  
610 370.
- 611 26. Hoffmann M, Kleine-Weber H, Schroeder S, Krüger N, Herrler T, Erichsen S,  
612 Schiergens TS, Herrler G, Wu NH, Nitsche A, Müller MA, Drosten C,  
613 Pöhlmann S. 2020. SARS-CoV-2 Cell Entry Depends on ACE2 and TMPRSS2  
614 and Is Blocked by a Clinically Proven Protease Inhibitor. *Cell* 181:271-280.e8.
- 615 27. Sungnak W, Huang N, Bécavin C, Berg M, Queen R, Litvinukova M, Talavera-  
616 López C, Maatz H, Reichart D, Sampaziotis F, Worlock KB, Yoshida M,  
617 Barnes JL, Banovich NE, Barbry P, Brazma A, Collin J, Desai TJ, Duong TE,  
618 Eickelberg O, Falk C, Farzan M, Glass I, Gupta RK, Haniffa M, Horvath P,  
619 Hubner N, Hung D, Kaminski N, Krasnow M, Kropski JA, Kuhnemund M, Lako  
620 M, Lee H, Leroy S, Linnarson S, Lundeberg J, Meyer KB, Miao Z, Misharin A  
621 v., Nawijn MC, Nikolic MZ, Nosedá M, Ordovas-Montanes J, Oudit GY, Pe'er

- 622 D, Powell J, Quake S, Rajagopal J, Tata PR, Rawlins EL, Regev A, Reyfman  
623 PA, Rozenblatt-Rosen O, Saeb-Parsy K, Samakovlis C, Schiller HB, Schultze  
624 JL, Seibold MA, Seidman CE, Seidman JG, Shalek AK, Shepherd D, Spence  
625 J, Spira A, Sun X, Teichmann SA, Theis FJ, Tsankov AM, Vallier L, van den  
626 Berge M, Whitsett J, Xavier R, Xu Y, Zaragosi LE, Zerti D, Zhang H, Zhang K,  
627 Rojas M, Figueiredo F. 2020. SARS-CoV-2 entry factors are highly expressed  
628 in nasal epithelial cells together with innate immune genes. *Nature Medicine*  
629 2020 26:5 26:681–687.
- 630 28. Li MY, Li L, Zhang Y, Wang XS. 2020. Expression of the SARS-CoV-2 cell  
631 receptor gene ACE2 in a wide variety of human tissues. *Infect Dis Poverty*  
632 9:1–7.
- 633 29. Xu J, Lazartigues E. 2022. Expression of ACE2 in Human Neurons Supports  
634 the Neuro-Invasive Potential of COVID-19 Virus. *Cell Mol Neurobiol* 42:305.
- 635 30. Jackson CB, Farzan M, Chen B, Choe H. 2021. Mechanisms of SARS-CoV-2  
636 entry into cells. *Nature Reviews Molecular Cell Biology* 2021 23:1 23:3–20.
- 637 31. Cuervo NZ, Grandvaux N. 2020. Ace2: Evidence of role as entry receptor for  
638 sars-cov-2 and implications in comorbidities. *Elife* 9:1–25.
- 639 32. Ou X, Liu Y, Lei X, Li P, Mi D, Ren L, Guo L, Guo R, Chen T, Hu J, Xiang Z,  
640 Mu Z, Chen X, Chen J, Hu K, Jin Q, Wang J, Qian Z. 2020. Characterization of  
641 spike glycoprotein of SARS-CoV-2 on virus entry and its immune cross-  
642 reactivity with SARS-CoV. *Nature Communications* 2020 11:1 11:1–12.
- 643 33. Nelson EA, Dyllal J, Hoenen T, Barnes AB, Zhou H, Liang JY, Michelotti J,  
644 Dewey WH, DeWald LE, Bennett RS, Morris PJ, Guha R, Klumpp-Thomas C,  
645 McKnight C, Chen YC, Xu X, Wang A, Hughes E, Martin S, Thomas C,  
646 Jahrling PB, Hensley LE, Olinger GG, White JM. 2017. The

- 647           phosphatidylinositol-3-phosphate 5-kinase inhibitor apilimod blocks filoviral  
648           entry and infection. PLoS Negl Trop Dis 11.
- 649   34.   Kang YL, Chou YY, Rothlauf PW, Liu Z, Soh TK, Cureton D, Case JB, Chen  
650           RE, Diamond MS, Whelan SPJ, Kirchhausen T. 2020. Inhibition of PIKfyve  
651           kinase prevents infection by Zaire ebolavirus and SARS-CoV-2. Proc Natl  
652           Acad Sci U S A 117:20803–20813.
- 653   35.   Wallroth A, Haucke V. 2018. Phosphoinositide conversion in endocytosis and  
654           the endolysosomal system. J Biol Chem 293:1526–1535.
- 655   36.   Korzowski A, Weinfurter N, Mueller S, Breitling J, Goerke S, Schlemmer HP,  
656           Ladd ME, Paech D, Bachert P. 2020. Volumetric mapping of intra- and  
657           extracellular pH in the human brain using 31 P MRSI at 7T. Magn Reson Med  
658           84:1707–1723.
- 659   37.   Lehtonen Š, Höytyläinen I, Voutilainen J, Sonninen TM, Kuusisto J, Laakso M,  
660           Hämäläinen RH, Oksanen M, Koistinaho J 2018. Generation of a human  
661           induced pluripotent stem cell line from a patient with a rare A673T variant in  
662           amyloid precursor protein gene that reduces the risk for Alzheimer’s disease.  
663           Stem Cell Res 30:96–99.
- 664   38.   Nehme R, Zuccaron E, Ghosh SD, Li C, Sherwood JL, Pietiläinen O, Barrett  
665           LE, Limone F, Worringer KA, Kommineni S, Zang Y, Cacchiarelli D, Meissner  
666           A, Adolfsson R, Haggarty S, Madison J, Muller M, Arlotta P, Fu Z, Feng G,  
667           Eggan K 2018. Combining *NGN2* programming with developmental patterning  
668           generates human excitatory neurons with NMDAR-mediated synaptic  
669           transmission. Cell Rep. 23:2509–2523.

- 670 39. Muller PY, Janovjak H, Miserez AR, Dobbie Z 2002: Processing of gene  
671 expression data generated by quantitative real-time RT-PCR. *Biotechniques*  
672 32:1372–4.
- 673 40. Stirling DR, Carpenter AE, Cimini BA. 2021. CellProfiler Analyst 3.0:  
674 Accessible data exploration and machine learning for image analysis.  
675 *Bioinformatics* 37:3992–3994.  
676

677 **Figures and legends:**

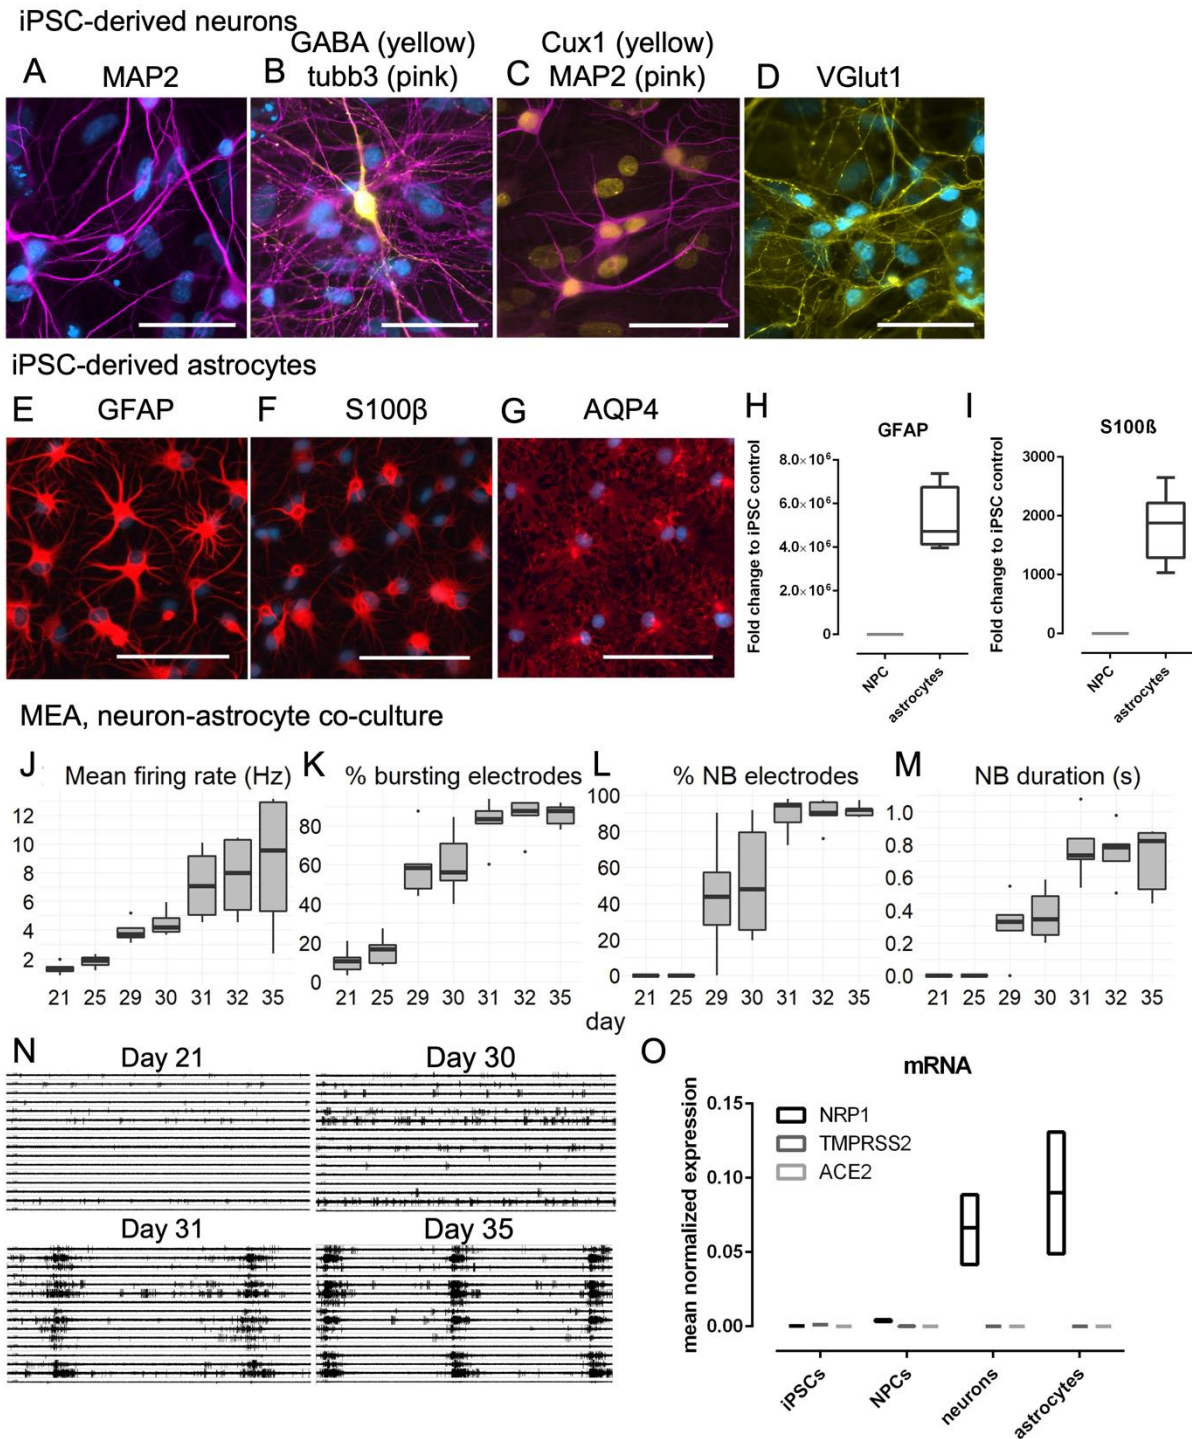

678 **Figure 1. Characterization of hiPSC-derived neurons and astrocytes.** A-D.  
 679 Immunocytochemical staining of hiPSC-derived NGN2-neurons with MAP2, tubb3,  
 680 GABA, Cux1 and Vglut1. Scale bar: 50  $\mu$ m. N=5 cell lines. E-G. Immunocytochemical  
 681 staining of iPSC-derived astrocytes with GFAP, S100 $\beta$  and AQP4. Scale bar: 100  $\mu$ m.

682 N=4 cell lines. H-I. qRT-PCR of GFAP and S100 $\beta$  expression in hiPSC-derived  
 683 astrocytes. N=4 cell lines. J-M. Quantification of the mean firing rate (Hz), percentage  
 684 of electrodes partaking in bursts, percentage of electrodes partaking in network bursts,  
 685 and network burst duration (s). N=3 cell lines. N. Representative images of MEA  
 686 recordings from neuron-astrocyte co-cultures at days 21, 30, 31 and 35. O. qRT-PCR  
 687 of viral receptor expression in hiPSCs, NPCs, neurons, and astrocytes. N=2-4 cell  
 688 lines.  
 689

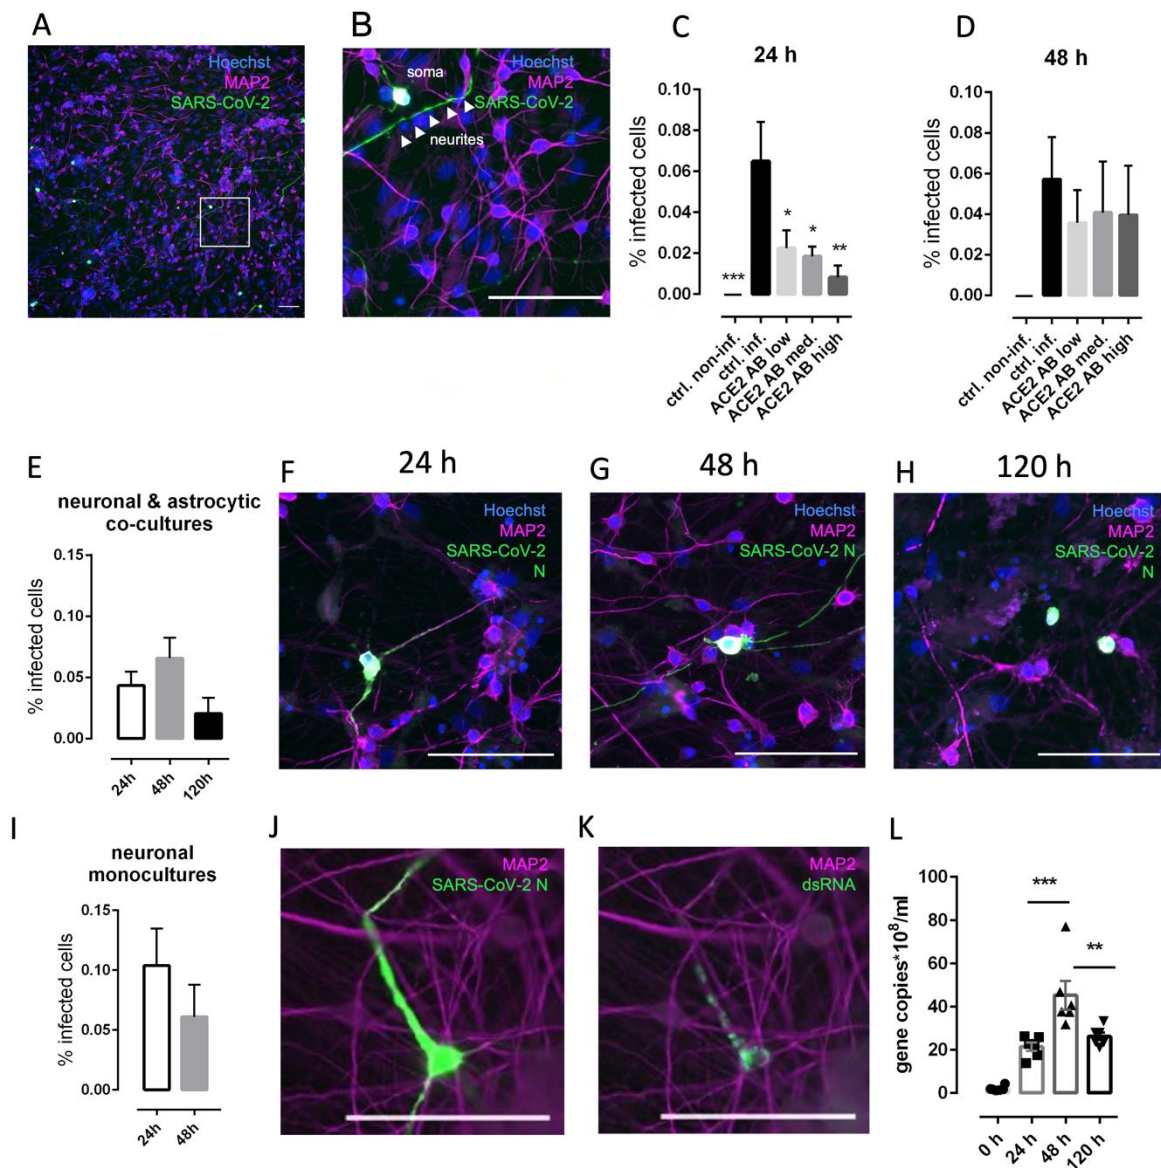

690

691 **Figure 2. Infection of hiPSC-derived neural cultures by SARS-CoV-2 is mainly**  
692 **dependent on ACE2 receptor and does not spread efficiently.** A. Representative  
693 image of SARS-CoV-2 N protein staining in the infected hiPSC-derived co-cultures of  
694 neurons and astrocytes (48 hpi). B. Enlarged area from the box in Fig. 2A. C. Infection  
695 of neurons is blocked by anti-ACE2 antibody in a dose-dependent manner at 24 hpi.  
696 N=6 samples per group. D. Infection of neurons is not blocked by anti-ACE2 antibody  
697 when the virus remains in the medium for 48 h. N=6 samples per group. E. Percentage  
698 of the infected cells in co-cultures consisting of neurons and astrocytes (all the infected  
699 cells were identified as neurons based on their MAP2 expression) does not change at  
700 different time points tested. N=6 samples per group. F, G, H. Representative images  
701 of neurons co-cultured with astrocytes, infected with SARS-CoV-2 and stained with N  
702 protein collected at 24, 48 and 120 hpi. L. Percentage of the infected cells in neuronal  
703 monocultures does not change at different time points and is similar to the infection  
704 level in neurons cultured with astrocytes. N=6 samples per group. H. Staining of an  
705 infected cell with MAP2, anti-N and (I) anti-dsRNA antibody that demonstrate their  
706 colocalization. J. qRT-PCR of the cell medium at different time points post infection.  
707 N=6 samples per group. All scale bars are 100  $\mu$ m. Columns and bars represent mean  
708  $\pm$  SEM, respectively. Data were analyzed by (C) ordinary one-way ANOVA followed  
709 by Dunnett's multiple comparisons test, (D, E) ordinary one-way ANOVA, (L) unpaired  
710 t test, (J) ordinary one-way ANOVA followed by Tukey's multiple comparisons test.  
711 \* $p < 0.05$ , \*\* $p < 0.005$ , \*\*\* $p < 0.0005$ .

712



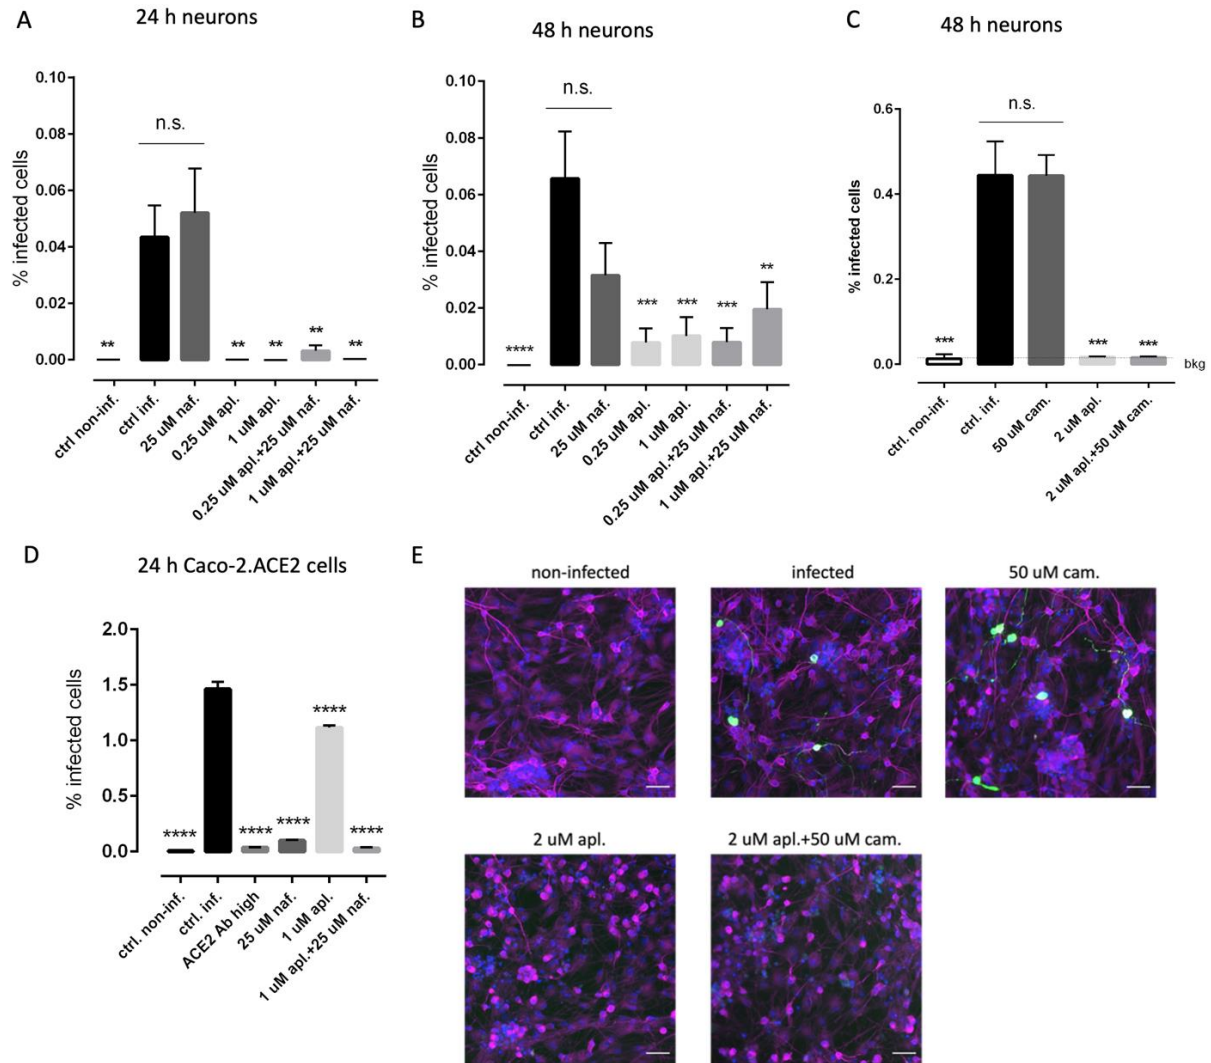

713

714 **Figure 3. SARS-CoV-2 infection of hiPSC-derived neural cultures is blocked by**

715 **inhibition of PIK5K but not serine proteases. A. Infection of neurons can be**

716 **blocked by apilimod but not by nafamostat at 24 h at 1.5 MOI. N=6 samples per group.**

717 **B. Infection of neurons can be blocked by apilimod but not by nafamostat at 48 h at**

718 **1.5 MOI. N=6 samples per group. C. Infection of neurons can be blocked by apilimod**

719 **but not by camostat at 48 h at 15 MOI. N=3 samples per group. D. SARS-CoV-2**

720 **infection can be effectively blocked by nafamostat in Caco-2 cells expressing ACE2,**

721 **where the major cell entry route for the virus is through the plasma membrane and not**

722 **through late endosomes/lysosomes. N=3 samples per group. E. Representative**

723 **images of SARS-CoV-2 infection (staining with N protein) in neural cultures at 48 h at**

724 15 MOI. Blue – Hoechst 33342, magenta – MAP2, green – SARS-CoV-2 N. All scale  
725 bars are 100  $\mu$ m. Columns and bars represent mean  $\pm$  SEM, respectively. Data were  
726 analyzed by ordinary one-way ANOVA followed by Dunnett's multiple comparisons  
727 test.

728

729 **Supplementary material:**

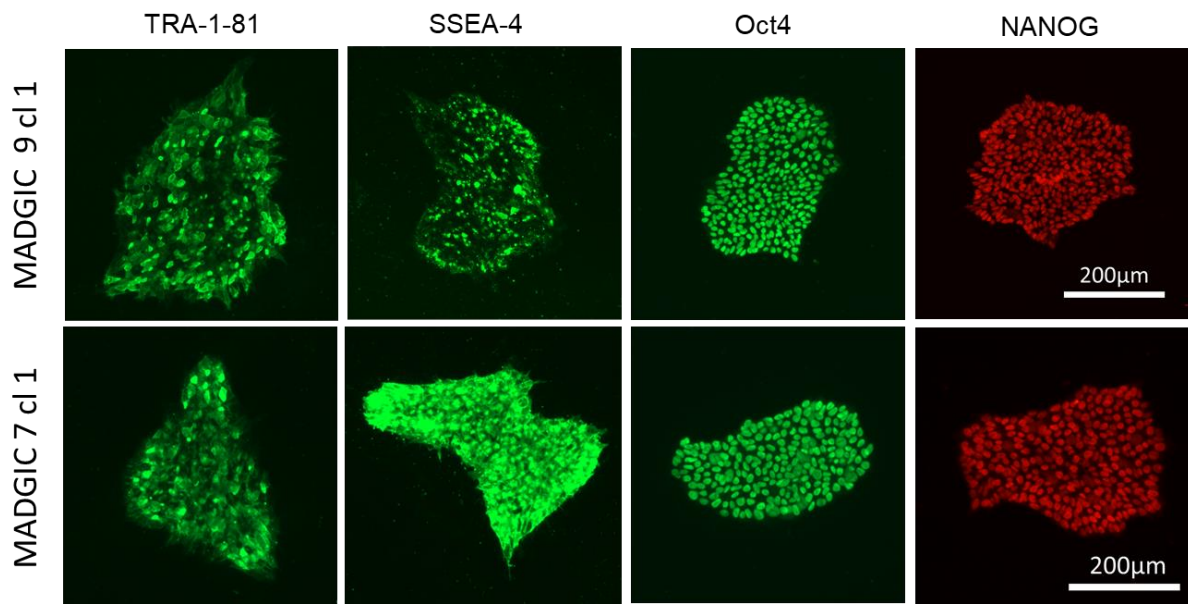

730

731 **Sup. Fig. 1. Immunocytochemical characterization of previously unpublished**  
732 **hiPSC lines (MADGIC 7c11 & MADGIC 9c11) with TRA-1-81, stage-specific**  
733 **embryonic antigen 4 (SSEA-4), octamer-binding transcription factor 4 (Oct4) and**  
734 **NANOG antibodies. Scale bar 200  $\mu$ m.**

735

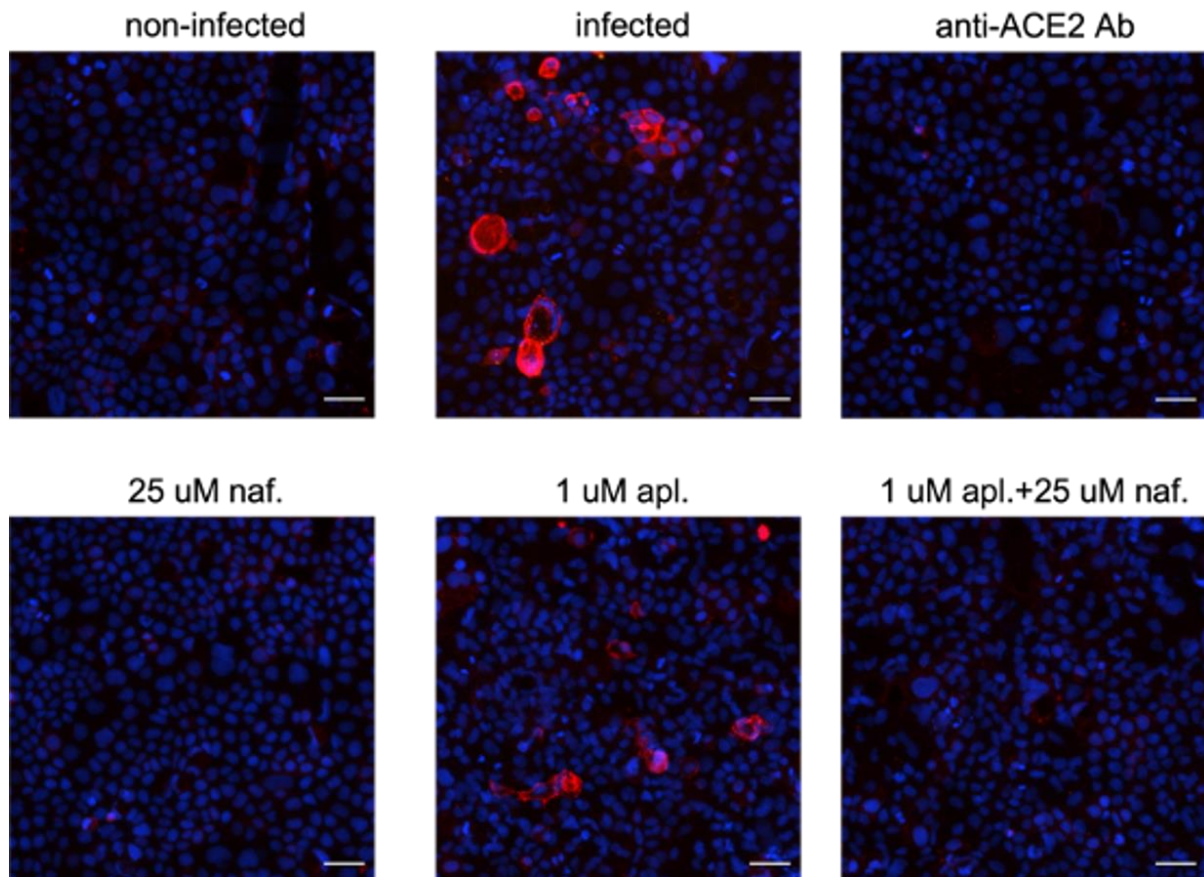

736

737 **Sup. Fig. 2. Representative images of SARS-CoV-2 infection (staining with N**  
738 **protein) in Caco-2.ACE2 cells at 24 hpi at 2.5 MOI. Blue – Hoechst 33342, red –**  
739 **SARS-CoV-2 N. Scale bar 100  $\mu$ m.**

740

741 **Sup. Table 1. A list of the hiPS cell lines used in this study.**

| ID          | Gender | Age | Cell type            | Published in          |
|-------------|--------|-----|----------------------|-----------------------|
| MADGIC 1cl7 | male   | 67  | Astrocyte            | Jäntti et. al 2022    |
| MADGIC 4cl1 | male   | 65  | Astrocyte,<br>neuron | Lehtonen et. al. 2018 |
| MADGIC 6cl1 | male   | 63  | Neuron               | Jäntti et. al 2022    |

|              |      |    |                      |                        |
|--------------|------|----|----------------------|------------------------|
| MADGIC 7cl1  | male | 66 | Neuron               | Previously unpublished |
| MADGIC 8cl1  | male | 64 | Astrocyte,<br>neuron | Jäntti et. al 2022     |
| MADGIC 9cl1  | male | 58 | Neuron               | Previously unpublished |
| MADGIC 12cl2 | male | 58 | Astrocyte,<br>neuron | Rolova et. al. 2020    |

742

743 **Sup. Table 2. Primary and secondary antibodies used in the study.**

| Antibody            | Concentration used | Manufacturer             | Reference number |
|---------------------|--------------------|--------------------------|------------------|
| ACE2 goat           | 1:1000             | R&D Systems              | AF933            |
| CTIP2 rat           | 1:500              | Abcam                    | ab18465          |
| Cux1 mouse          | 1:500              | Abcam                    | ab54583          |
| GABA rabbit         | 1:500              | Sigma                    | A2052            |
| GFAP rabbit         | 1:500              | Agilent                  | Z033429-2        |
| MAP2 chicken        | 1:1000             | Abcam                    | ab92434          |
| Nanog               | 1:100              | Thermo Fisher Scientific | MA1-017          |
| Nucleocapsid rabbit | 1:2000             | gift from Jussi Hepoioki | (38)             |
| Oct4                | 1:400              | Millipore                | MAB4401          |
| S100 $\beta$ rabbit | 1:500              | Abcam                    | ab52642          |
| SSEA4               | 1:400              | Millipore                | MAB4304          |

|                                  |        |                  |            |
|----------------------------------|--------|------------------|------------|
| TRA-181                          | 1:200  | Millipore        | MAB4381    |
| Tubulin-3 mouse                  | 1:2000 | Biologend        | 801201     |
| Vglut1 rabbit                    | 1:500  | Sigma            | V0389      |
| Goat anti-mouse<br>488           | 1:400  | Molecular Probes | A11001     |
| Goat anti-mouse<br>Alexa 633     | 1:500  | Invitrogen       | A21052     |
| Goat anti-rabbit<br>Alexa 488    | 1:1000 | Invitrogen       | A11008     |
| Goat anti-chicken<br>Alexa 568   | 1:1000 | ThermoFisher     | AB_2534098 |
| Chicken anti-goat<br>Alexa 488   | 1:1000 | Invitrogen       | A21467     |
| Donkey anti-<br>rabbit Alexa 647 | 1:1000 | Invitrogen       | A31573     |
| Donkey anti-<br>mouse Alexa 555  | 1:1000 | Invitrogen       | A32773     |

744

## 745 **References for Supplementary material**

- 746 1. Jääntti H, Sitnikova V, Ischenko Y, Shakirzyanova A, Giudice L, Ugidos IF,  
747 Gòmes-Budia M, Korvenlaita N, Ohtonen S, Belaya I, Fazaludeen F, Mikhailov  
748 N, Gotkiewicz M, Ketola K, Lehtonen Š, Koistinaho J, Kanninen KM  
749 2. Lehtonen Š, Höytyläinen I, Voutilainen J, Sonninen TM, Kuusisto J, Laakso M,  
750 Hämäläinen RH, Oksanen M, Koistinaho J 2018. Generation of a human  
751 induced pluripotent stem cell line from a patient with a rare A673T variant in

- 752 amyloid precursor protein gene that reduces the risk for Alzheimer’s disease.  
753 Stem Cell Res 30:96–99.
- 754 3. Rolova T, Wu YC, Koskuvi M, Voutilainen J, Sonninen TM, Kuusisto J, Laakso  
755 M, Hämäläinen RH, Koistinaho J, Lehtonen Š. 2020. Generation of a human  
756 induced pluripotent stem cell line (UEFi003-A) carrying heterozygous A673T  
757 variant in amyloid precursor protein associated with a reduced risk of  
758 Alzheimer’s disease. Stem Cell Res 48:101968.
- 759 4. Rusanen J, Kareinen L, Levanov L, Mero S, Pakkanen SH, Kantele A, Amanat  
760 F, Krammer F, Hedman K, Vapalahti O, Hepojoki J. 2021. A 10-Minute “Mix and  
761 Read” Antibody Assay for SARS-CoV-2. Viruses 13.
